# Supplementary material
Source: publisher figshare collection journal article supplement (https://asha.figshare.com/articles/dataset/_/25822675)
Supplement: Supplementary file 1 [file 1]

**Supplemental Material S2.** Results from a series of 2 (dialect)  $\times$  3 (group) ANOVAs, with group main effects followed by least significance difference *t*-test procedures.

Below are results from a series of 2 (dialect)  $\times$  3 (group) ANOVAs, with group main effects followed by Least Significance Difference *t*-test procedures. When all children did not contribute data to an analysis, the number who did is reported. Missing test data occurred because TD4 children were too young for test; missing data for maternal education occurred when a caregiver elected to leave question blank (see original studies for details).

**Age**

Dialect:  $F(1, 240) = 8.12, p = .005, \eta_p^2 = .03$

Group:  $F(2, 240) = 153.02, p < .001, \eta_p^2 = .56$

Dialect  $\times$  Group  $F(2, 240) = 13.16, p < .001, \eta_p^2 = .10$

AAE: DLD > TD6 > TD4

SWE: DLD = TD6 > TD4

DLD: AAE = SWE

TD6: AAE = SWE

TD4: AAE > SWE

**Maternal Education**

$n = 178$

Group:  $F(2, 172) = 9.19, p < .001, \eta_p^2 = .10$

DLD < TD6 = TD4

**Nonmainstream Form Density from Language Samples**

Dialect:  $F(1, 240) = 130.95, p < .001, \eta_p^2 = .35$

AAE > SWE

Group:  $F(2, 240) = 25.46, p < .001, \eta_p^2 = .18$

DLD > TD6 = TD4

**z Syntax Score**

$n = 233$

Group:  $F(2, 228) = 245.57, p < .001, \eta_p^2 = .680$

DLD < TD6 = TD4

### **z Nonverbal IQ Score**

$n = 244$

Group:  $F(2, 238) = 14.75, p < .001, \eta_p^2 = .11$

DLD < TD6 < TD4

### **z Vocabulary Score**

Dialect:  $F(1, 240) = 6.83, p = .01, \eta_p^2 = .03$

SWE > AAE

Group:  $F(2, 240) = 145.36, p < .001, \eta_p^2 = .55$

TD6 > TD4 > DLD

## MLU – Words

|                           | AAE            |                |                | SWE            |                |                |
|---------------------------|----------------|----------------|----------------|----------------|----------------|----------------|
|                           | DLD            | TD6            | TD4            | DLD            | TD6            | TD4            |
| Without clauses separated | 4.91<br>(0.97) | 5.90<br>(1.07) | 4.95<br>(0.88) | 4.59<br>(0.78) | 5.76<br>(1.01) | 4.41<br>(0.48) |
| With clauses separated    | 4.72<br>(0.78) | 5.51<br>(0.86) | 4.74<br>(0.72) | 4.42<br>(0.64) | 5.37<br>(0.80) | 4.31<br>(0.41) |
| Difference in MLU – Words | 0.18<br>(0.22) | 0.38<br>(0.29) | 0.21<br>(0.23) | 0.17<br>(0.20) | 0.39<br>(0.27) | 0.10<br>(0.09) |

Results from 2 (dialect) × 3 (group) ANOVA: Difference in MLU – Words

Group:  $F(2, 240) = 21.61, p < .001, \eta_p^2 = .15$

TD6 > DLD = TD4
